# Supplementary material for: Transcriptomic profiling of Schlemm’s canal cells reveals a lymphatic-biased identity and three major cell states
Source: bioRxiv preprint, doi:10.1101/2023.08.31.555823, version 3 (2024-08-06)
Supplement: Table 1 [file 555823_file02.docx]

| pathway | pval | padj | log2err | ES | NES | size | leadingEdge |
| --- | --- | --- | --- | --- | --- | --- | --- |
| REACTOME ECM PROTEOGLYCANS | 1.28E-05 | 0.0001277 | 0.59332548 | 0.6391868 | 2.54048611 | 17 | LAMA2|TNC|NCAM1|TGFB2|FN1|COL6A1|COMP|MUSK|COL2A1|ITGB5|COL6A2|ITGA7|ITGA8|HAPLN1 |
| REACTOME INTEGRIN CELL SURFACE INTERACTIONS | 0.0040083 | 0.0200415 | 0.40701792 | 0.45224576 | 1.86792533 | 19 | ITGB8|TNC|COL8A1|FN1|CD44|COL6A1|COMP|COL2A1|ITGB5|COL6A2|ITGA7|ITGA8 |
| NABA MATRISOME | 0.00731642 | 0.02438806 | 0.40701792 | 0.25408532 | 1.75462179 | 94 | LAMA2|DPT|ADAMTSL4|MEGF6|ANXA8|CHRDL2|PLXDC2|MMRN1|CHAD|SEMA3C|TNFAIP6|TNC|BMP5|COL8A1|IL1RN|TGFB2|THBS4|FGL2|SDC4|GPC4|FN1|COL12A1|COL6A1|CCL11|LGALS3|COMP|COL2A1 |
| REACTOME SIGNALING BY WNT | 0.02178265 | 0.05445662 | 0.35248786 | -0.4641548 | -1.696888 | 12 | SOX17|WNT5B|PDE6G|SOX13|PSMA8|ARRB2 |
| NABA ECM GLYCOPROTEINS | 0.08726004 | 0.17452007 | 0.19991523 | 0.33346328 | 1.50424765 | 24 | LAMA2|DPT|MMRN1|TNFAIP6|TNC|THBS4|FGL2|FN1|COMP |
| WP VEGFAVEGFR2 SIGNALING PATHWAY | 0.13270142 | 0.22116904 | 0.18820415 | -0.2519388 | -1.344932 | 33 | CGNL1|SELE|RCAN1|FLT1|RND1|MMRN2|FMNL3|HSPB1|NOS3|IGFBP7 |
| NABA MATRISOME ASSOCIATED | 0.27377049 | 0.3911007 | 0.10208011 | 0.18915585 | 1.16411213 | 59 | ADAMTSL4|MEGF6|ANXA8|CHRDL2|PLXDC2|SEMA3C|BMP5|IL1RN|TGFB2|SDC4|GPC4 |
| REACTOME TRANSPORT OF SMALL MOLECULES | 0.47833333 | 0.57328605 | 0.07200331 | 0.1608429 | 0.99145051 | 61 | RUNX1|MB|TRDN|SLC38A3|CASQ2|SLC5A3|ATP2A1|SLC43A2|SLC6A6|SLC8A1|SLC7A2|PRKAR2B|ABCA6|ATP1B1|ATP1B2|STEAP3|SLC7A8|SLC18A2|ADCY2|SLC16A1 |
| REACTOME SLC MEDIATED TRANSMEMBRANE TRANSPORT | 0.51595745 | 0.57328605 | 0.0713053 | 0.19817622 | 0.94970303 | 28 | RUNX1|SLC38A3|SLC5A3|SLC43A2|SLC6A6|SLC8A1|SLC7A2|SLC7A8|SLC18A2|SLC16A1 |
| REACTOME INTERLEUKIN 4 AND INTERLEUKIN 13 SIGNALING | 0.82944345 | 0.82944345 | 0.04929177 | 0.21001018 | 0.69781601 | 11 | FN1|CCL11|MMP3|LIF |

|  | SEC enriched pathways |
| --- | --- |
|  | LEC enriched pathways |
