# Supplementary material for: Transcriptomic profiling of Schlemm’s canal cells reveals a lymphatic-biased identity and three major cell states
Source: bioRxiv preprint, doi:10.1101/2023.08.31.555823, version 3 (2024-08-06)
Supplement: Table 2 [file 555823_file03.docx]

| pathway | pval | padj | log2err | ES | NES | size | leadingEdge |
| --- | --- | --- | --- | --- | --- | --- | --- |
| REACTOME TRANSPORT OF SMALL MOLECULES | 2.50E-07 | 2.86E-06 | 0.67496286 | 0.36734478 | 2.44400992 | 112 | SLC7A5|SLC2A1|SLC16A1|SLC39A10|ATP1B2|SLCO1C1|SLC6A6|SLC38A3|SLC1A2|GNGT1|BSG|ABCB1|CA4|TFRC|SLC1A1|PLTP|CASQ2|ATP10A|SLC38A5|ATP2A3|SLC7A1|LSR|LRRC8C|SLC24A1|PRKAR2B|AQP11|SLC43A2|ATP8A1|STEAP3|SLC30A1|SCARB1|SLCO2B1|ATP1A3|SLC16A2|SLC11A1|ABCA4|SLC1A3|RUNX1|ANO1|SLC31A1|TRPC3 |
| NABA MATRISOME | 4.76E-07 | 2.86E-06 | 0.67496286 | -0.3275322 | -2.2610346 | 173 | FBLN5|ADAMTSL1|NTN1|PCSK6|ABI3BP|MMP14|MMRN1|LRG1|SEMA3D|PRELP|FGL2|TIMP2|NPNT|SERPINE1|THSD4|IL7|EGLN3|SNED1|IGFBP4|SEMA3F|ADAMTS15|LTBP3|INHBB|TIMP1|PGF|ANXA1|ITIH3|COL6A3|IGF1|LAMA4|COL23A1|FBN1|MMRN2|S100A10|WNT9A|POSTN|IL6|PLXND1|PDGFA|LUM|PAPPA|FMOD|AEBP1|PLOD1|CD109|TGFB3|P3H3|ADAMTS5|IGSF10|EMILIN1|ANGPTL2|THBS1|HGF|FBLN2|LAMB1|FGF12|COL13A1|S100A6|ADAMTS9|TGFBI|ANXA11|FSTL1|GDF10|SMOC1|LOXL2|ITIH2|ADAMTS4|SERPING1 |
| REACTOME SLC MEDIATED TRANSMEMBRANE TRANSPORT | 1.09E-05 | 4.36E-05 | 0.59332548 | 0.44947394 | 2.43794772 | 49 | SLC7A5|SLC2A1|SLC16A1|SLC39A10|SLCO1C1|SLC6A6|SLC38A3|SLC1A2|BSG|SLC1A1|SLC38A5|SLC7A1|SLC24A1|SLC43A2|SLC30A1|SLCO2B1|SLC16A2|SLC11A1|SLC1A3|RUNX1|SLC31A1 |
| PID IL6 7 PATHWAY | 3.77E-05 | 0.00011317 | 0.55733224 | -0.6614673 | -2.4316911 | 16 | LBP|FOS|SOCS3|JUN|JUNB|CEBPD|TIMP1|IL6|JAK1|MYC|IRF1|PTPRE|MAPK11 |
| NABA ECM GLYCOPROTEINS | 0.00012041 | 0.00026487 | 0.5384341 | -0.4534414 | -2.3074268 | 46 | FBLN5|NTN1|ABI3BP|MMRN1|LRG1|FGL2|NPNT|THSD4|SNED1|IGFBP4|LTBP3|LAMA4|FBN1|MMRN2|POSTN|AEBP1|IGSF10|EMILIN1|THBS1|FBLN2|LAMB1 |
| REACTOME INTERLEUKIN 4 AND INTERLEUKIN 13 SIGNALING | 0.00013244 | 0.00026487 | 0.51884808 | -0.5214447 | -2.3269186 | 29 | LBP|FOS|SOCS3|JUNB|FSCN1|CEBPD|LCN2|TIMP1|ANXA1|IL6|CCND1|JAK1|HGF|PIM1|MYC |
| WP TGFBETA SIGNALING PATHWAY | 0.00152519 | 0.00261462 | 0.45505987 | -0.4763487 | -2.0098712 | 25 | FOS|JUN|FOSB|JUNB|ATF3|ITGB4|MET|TGIF1|DAB2|CCND1|THBS1|MYC|CAV1 |
| NABA MATRISOME ASSOCIATED | 0.00348976 | 0.00523464 | 0.4317077 | -0.2802792 | -1.7440699 | 106 | ADAMTSL1|PCSK6|MMP14|SEMA3D|TIMP2|SERPINE1|IL7|EGLN3|SEMA3F|ADAMTS15|INHBB|TIMP1|PGF|ANXA1|ITIH3|IGF1|S100A10|WNT9A|IL6|PLXND1|PDGFA|PAPPA|PLOD1|CD109|TGFB3|P3H3|ADAMTS5|ANGPTL2|HGF|FGF12|S100A6|ADAMTS9|ANXA11|FSTL1|GDF10|LOXL2|ITIH2|ADAMTS4|SERPING1 |
| WP VEGFAVEGFR2 SIGNALING PATHWAY | 0.0059296 | 0.00790613 | 0.40701792 | -0.3235111 | -1.7829894 | 63 | MMP14|APOLD1|RND1|EGR1|SELE|RCAN1|JUN|LDB2|NR4A1|NFATC1|FSCN1|PGF|ANXA1 |
| REACTOME INTEGRIN CELL SURFACE INTERACTIONS | 0.07641921 | 0.09170306 | 0.24133998 | 0.3350766 | 1.46690867 | 25 | BSG|FN1|VTN|JAM2|ITGB8|VWF|ITGB5|ITGA1 |
| REACTOME ECM PROTEOGLYCANS | 0.57012751 | 0.62195728 | 0.06767604 | -0.2176867 | -0.9157219 | 24 | SERPINE1|ITGA9|COL6A3|LAMA4|LUM|FMOD|TGFB3|LAMB1 |
| REACTOME SIGNALING BY WNT | 0.72747748 | 0.72747748 | 0.06613262 | 0.16169022 | 0.77768606 | 33 | GNGT1|PDE6G|LEF1|TCF7|PDE6B|AXIN2|PDE6A|PRKCB|GNAT2 |

|  | SEC enriched pathways |
| --- | --- |
|  | BEC enriched pathways |
